# Supplementary material
Source: Springer Nature journal article supplement (https://www.springermedizin.de/resource/supplementary/12936_2010_1246_MOESM2_ESM.pdf/9549330)

## Gene target

MSP2 / microsatellites

DBL5ε

Genotype evolution

A

n=16/32

P1

P2

Pla

P1

P2

Pla

B

n=16/32

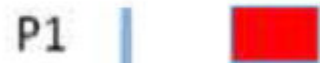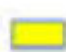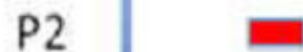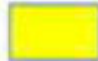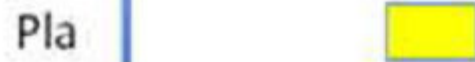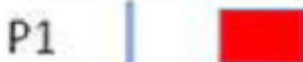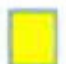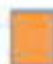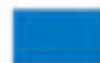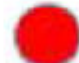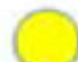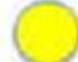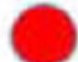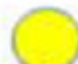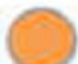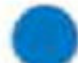

Supplement: MOESM2 [file 9549330]
